# Supplementary material
Source: Springer Nature journal article supplement (http://www.springermedizin.de/resource/supplementary/12872_2011_514_MOESM3_ESM.pdf/9430140)

A

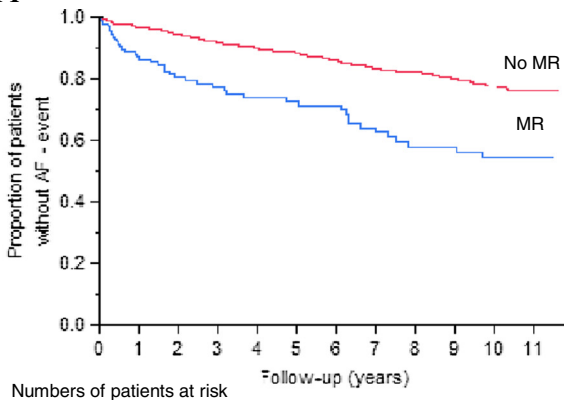

Numbers of patients at risk

|       |     |     |     |     |     |     |
|-------|-----|-----|-----|-----|-----|-----|
| No MR | 791 | 751 | 721 | 698 | 677 | 656 |
| MR    | 149 | 125 | 119 | 117 | 108 | 106 |

B

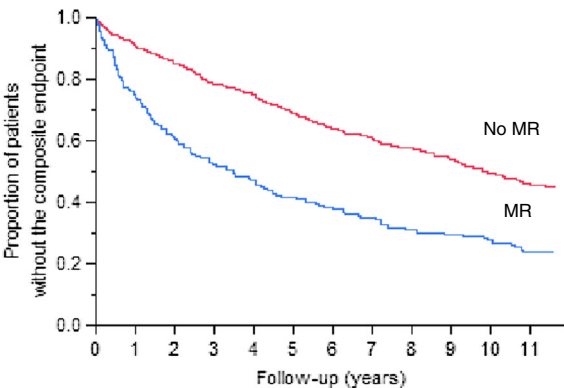

Numbers of patients at risk

|       |     |     |     |     |     |     |
|-------|-----|-----|-----|-----|-----|-----|
| No MR | 791 | 674 | 594 | 507 | 455 | 392 |
| MR    | 149 | 90  | 70  | 57  | 46  | 41  |

Supplement: MOESM3 [file 9430140]
